# Supplementary material
Source: publisher site journal article supplement (https://static.cambridge.org/content/id/urn:cambridge.org:id:article:S0016756818000870/resource/name/S0016756818000870supp001.xlsx)
Supplement: Supplementary file 1 [file S0016756818000870supp001.xlsx]

## Sheet: Sheet1
Compilation of analytical data at Site U1457
Sample No	Site	Hole	Core	Type	Section	Sec half	Parent curated length (cm)	Top Offset (cm)	Bottom Offset (cm)	CSF-A (m)	TOC (%)	TN (%)	C/N	CaCO3 (%)	δ13C (‰)	C3 (%)	C4 (%)	MOM (%)
1	U1457	B	1	H	1	W	152	124	126	1.24	1.0449	0.1007	10.3764	32.4229	-20.586	29.45	28.6444	41.9056
2	U1457	A	1	H	3	W	150	100	102	3.22	0.774	0.0573	13.5079	19.7159	-21.282	32	22	46
3	U1457	B	2	H	2	W	146	123	125	5.9	0.4164	0.0135	30.8444	20.6308	-22.612	46.381	15.3228	38.2963
4	U1457	B	2	H	4	W	146	46	48	8.05	0.8082	0.0449	18	20.82	-21.981	34.4545	15.3131	50.2323
5	U1457	A	2	H	2	W	150	110	112	11.3	0.6032	0.0503	11.992	22.3541	-19.483	33.7273	36.4545	29.8182
6	U1457	B	3	H	4	W	150	54	56	17.74	0.9863	0.0912	10.8147	20.715	-19.941	34.4545	34.404	31.1414
7	U1457	A	3	H	1	W	150	102	104	19.22	0.6446	0.02	32.23	22.4574	-21.733	34.4545	18.4949	47.0505
8	U1457	A	3	H	4	W	150	105	107	23.75	0.4469	0.0507	8.8146	33.092	-20.644	32.5455	28.7576	38.697
9	U1457	B	4	H	3	W	150	81	83	26.01	0.5887	0.0215	27.3814	23.9399	-20.841	34.4545	27.5859	37.9596
10	U1457	B	4	H	5	W	150	139	141	29.59	1.0967	0.0606	18.0974	29.5697	-19.517	33.6818	38.404	27.9141
11	U1457	A	4	H	3	W	150	82	84	31.52	0.6641	0.0642	10.3442	30.5696	-20.96	30.6364	24.2222	45.1414
12	U1457	A	4	H	5	W	150	58	60	34.28	0.7878	0.0343	22.9679	42.5475	-20.974	30.6364	24.2222	45.1414
13	U1457	B	5	H	4	W	123	34	36	36.54	1.0298	0.1046	9.84512	38.0726	-20.13	30.6364	32.8586	36.5051
14	U1457	A	5	H	2	W	150	52	54	39.22	0.5842	0.0548	10.6606	24.2449	-20.595	32.3636	29.0303	38.6061
15	U1457	A	5	H	5	W	150	34	36	43.54	0.9208	0.0685	13.4423	21.1925	-19.485	33.2273	38.8586	27.9141
16	U1457	B	6	H	2	W	150	38	40	43.08	0.6671	0.0705	9.46241	26.7081	-19.999	32.3636	34.4848	33.1515
17	U1457	B	6	H	5	W	150	8	10	47.28	0.3533	0.0433	8.15935	66.2682	-21.585	33.4545	19.3131	47.2323
18	U1457	A	6	H	3	W	150	136	138	51.06	0.7276	0.0638	11.4044	55.3945	-20.804	34.4091	27.8182	37.7727
19	U1457	B	7	H	3	W	150	24	26	53.94	0.2164	0.0244	8.86885	25.3482	-21.45	32.5	20	47.5
20	U1457	B	7	H	5	W	150	52	53	57.22	0.462	0.0512	9.02344	29.7346	-20.044	32.5	33.6364	33.8636
21	U1457	A	7	H	4	W	145	2	4	60.72	0.9237	0.0861	10.7282	20.7417	-19.736	32.4091	36.1717	31.4192
22	U1457	B	8	H	2	W	150	26	28	61.96	0.8081	0.0522	15.4808	50.2563	-19.821	33.2273	35.6768	31.096
23	U1457	B	8	H	4	W	150	93	95	65.63	0.8309	0.082	10.1329	27.8389	-19.411	32.5	38.5859	28.9141
24	U1457	A	8	H	3	W	150	131	133	70.01	0.9205	0.0809	11.3782	34.1745	-19.723	32.4091	36.1717	31.4192
25	U1457	B	9	H	1	W	150	58	60	70.28	0.5324	0.0495	10.7556	47.5381	-20.977	30.5909	24.4545	44.9545
26	U1457	B	9	H	3	W	150	106	108	73.76	0.3529	0.0421	8.38242	13.4736	-21.774	34.0435	17.3527	48.6039
27	U1457	A	9	H	4	W	130	8	10	78.39	0.3691	0.0389	9.48843	12.6187	-22.241	37.9565	14.6473	47.3961
28	U1457	A	9	H	6	W	150	38	40	81.49	0.3318	0.0466	7.12017	12.1187	-21.848	34.0435	17.3527	48.6039
29	U1457	B	10	H	4	W	48	33	35	82.58	0.286	0.0423	6.76123	12.3887	-22.504	45.913	15.5266	38.5604
30	U1457	A	10	H	3	W	150	28	30	87.98	0.3129	0.0492	6.35976	12.232	-21.922	33.5	16	50.5
31	U1457	A	10	H	5	W	150	136	138	92.06	0.2949	0.0482	6.11826	12.9678	-22.095	38.2917	16	45.7083
32	U1457	A	10	H	7	W	71	58	60	93.79	0.2877	0.0465	6.1871	13.5153	-21.843	35.4167	17.9167	46.6667
33	U1457	A	11	H	3	W	127	8	10	97.28	0.2549	0.0367	6.9455	15.5285	-21.875	33.5	16	50.5
34	U1457	A	11	H	5	W	150	16	18	100.13	0.3235	0.0528	6.12689	14.2761	-21.466	35.2917	20.8704	43.838
35	U1457	B	13	H	1	W	150	130	132	102.5	0.2736	0.0577	4.74177	14.3478	-21.594	36.1667	20.2407	43.5926
36	U1457	A	12	H	2	W	74	6	8	104.78	0.2905	0.0552	5.26268	13.3153	-21.536	35.2917	20.8704	43.838
37	U1457	A	12	H	5	W	108	94	96	109.43	0.363	0.0535	6.78505	11.4754	-22.198	39.1667	15.3241	45.5093
38	U1457	A	13	F	1	W	150	98	100	112.18	0.3048	0.0506	6.02372	11.9704	-22.163	39.1667	15.3241	45.5093
39	U1457	A	13	F	3	W	138	106	108	115.26	0.3125	0.0417	7.494	11.8637	-22.464	47.0417	15.9074	37.0509
40	U1457	B	15	F	3	W	141	46	48	118.86	0.2179	0.0485	4.49278	12.7762	-22.036	37.2917	16.5278	46.1806
41	U1457	A	15	F	1	W	150	63	65	121.43	0.3132	0.0444	7.05405	11.1954	-21.687	37.2917	19.4444	43.2639
42	U1457	A	15	F	3	W	148	124	126	125.07	0.3535	0.0518	6.82432	12.4178	-21.902	33.5	16	50.5
43	U1457	B	17	F	3	W	100	90	92	128.53	0.2703	0.0394	6.86041	12.8795	-21.911	33.5	16	50.5
44	U1457	A	17	F	1	W	153	6	8	130.46	0.3855	0.0537	7.17877	11.7329	-21.823	35.4167	17.9167	46.6667
46	U1457	B	19	F	1	W	150	102	104	135.22	0.2486	0.0373	6.66488	12.5978	-22.526	46.7917	16.1667	37.0417
47	U1457	B	19	F	4	W	82	74	76	138.76	0.3416	0.0503	6.79125	12.6028	-22.323	42.4167	16.1667	41.4167
48	U1457	A	19	F	2	W	146	120	122	142.69	0.3419	0.0463	7.38445	12.4862	-21.925	33.5	16	50.5
49	U1457	B	21	F	2	W	141	36	38	144.67	0.2872	0.0434	6.61751	12.1162	-21.935	33.5	16	50.5
50	U1457	B	23	F	1	W	141	64	66	153.64	0.2934	0.0451	6.50554	12.2612	-21.273	36.125	23	40.875
51	U1457	B	23	F	4	W	78	38	40	157.11	0.3305	0.0522	6.33142	12.5128	-21.15	35.25	23.9074	40.8426
52	U1457	B	25	F	1	W	141	32	36	162.72	0.3486	0.0571	6.10508	12.8012	-21.614	36.1667	20.2407	43.5926
53	U1457	B	25	F	4	W	87	46	48	166.7	0.3988	0.0664	6.00602	12.1903	-21.003	33.5417	24.9074	41.5509
54	U1457	B	27	F	1	W	142	36	38	172.16	0.3637	0.0597	6.09213	13.1978	-21.297	36.1667	23.1574	40.6759
55	U1457	B	27	F	4	W	55	18	20	175.19	0.402	0.0664	6.05422	12.9736	-21.271	36.1667	23.1574	40.6759
56	U1457	B	29	F	1	W	144	42	44	181.62	0.4215	0.062	6.79839	12.8762	-21.133	34.4167	24.3241	41.2593
57	U1457	B	29	F	4	W	67	35	37	185.65	0.3863	0.0711	5.43319	11.8045	-20.895	35.2917	26.6574	38.0509
58	U1457	B	31	F	1	W	144	48	50	191.08	0.3358	0.0556	6.03957	14.1194	-21.746	37.0417	19.6574	43.3009
59	U1457	B	31	F	4	W	65	36	38	194.78	0.2298	0.0335	6.8597	14.2086	-21.965	37.0833	16.5741	46.3426
60	U1457	B	33	F	1	W	143	44	46	200.44	0.1947	0.0222	8.77027	12.2228	-22.304	42.3333	15.9907	41.6759
61	U1457	B	33	F	4	W	83	34	36	204.45	0.3373	0.0403	8.36973	13.1636	-21.496	35.2917	20.8704	43.838
62	U1457	C	6	R	1	W	100	42	44	230.82	0.2757	0.0406	6.79064	10.8154	-22.159	39.1667	15.3241	45.5093
63	U1457	C	7	R	1	W	82	39	43	240.49	0.3095	0.0463	6.68467	9.9154	-21.968	37.2917	16.5278	46.1806
64	U1457	C	8	R	1	W	150	102	104	250.82	0.3225	0.0453	7.11921	10.0771	-22.127	38.2917	16	45.7083
65	U1457	C	9	R	1	W	150	22	24	259.72	0.3152	0.0464	6.7931	10.7262	-21.673	37.4167	19.5	43.0833
66	U1457	C	9	R	3	W	76	39	41	262.6	0.2894	0.0433	6.6836	10.3113	-21.813	35.4167	17.9167	46.6667
67	U1457	C	10	R	1	W	121	66	68	269.86	0.3057	0.0446	6.85426	10.5362	-21.745	37.1667	19.6667	43.1667
68	U1457	C	11	R	1	W	150	88	90	279.78	0.339	0.048	7.0625	10.7279	-21.597	36.25	20.3241	43.4259
69	U1457	C	12	R	1	W	28	11	13	288.71	0.2914	0.0432	6.74537	10.3888	-22.259	42.375	16.2407	41.3843
71	U1457	C	14	R	1	W	105	64	66	308.64	0.3705	0.0567	6.53439	13.1045	-20.957	33.625	24.9907	41.3843
72	U1457	C	15	R	1	W	37	14	16	317.84	0.1962	0.0574	3.41812	15.4177	-21.081	34.5	24.4074	41.0926
73	U1457	C	17	R	1	W	30	10	12	337.2	0.4126	0.0509	8.10609	13.4286	-20.716	36.0417	28.6111	35.3472
74	U1457	C	18	R	1	W	150	72	74	347.52	0.4221	0.0585	7.21538	10.9329	-20.356	36.0417	31.1111	32.8472
75	U1457	C	18	R	4	W	150	50	52	351.8	0.3779	0.0468	8.07479	12.7178	-20.982	33.625	24.9907	41.3843
76	U1457	C	18	R	7	W	66	38	40	356.18	0.4372	0.0556	7.86331	12.4978	-20.705	35.9167	28.6481	35.4352
77	U1457	C	19	R	1	W	150	24	26	356.74	0.4017	0.0551	7.29038	11.9204	-20.452	34.4583	29.9907	35.5509
78	U1457	C	19	R	3	W	150	36	38	359.86	0.3913	0.0553	7.07595	12.9961	-20.858	35.375	26.7407	37.8843
79	U1457	C	19	R	5	W	105	50	52	363	0.4642	0.0479	9.69102	14.2961	-21.291	36.25	23.2407	40.5093
80	U1457	C	20	R	1	W	147	112	114	367.32	0.4071	0.0601	6.7696	12.5595	-20.753	37.0833	28.2407	34.6759
81	U1457	C	22	R	1	W	150	120	122	386.8	0.8642	0.0896	9.6475	21.76	-19.58	34.8333	37.2407	27.9259
82	U1457	C	22	R	3	W	150	106	108	389.66	1.1177	0.1165	9.5904	18.9126	-20.424	36.3333	31.2407	32.4259
83	U1457	C	23	R	1	W	138	66	68	395.96	1.4479	0.1289	11.2308	18.6893	-19.932	37.0833	35.7407	27.1759
84	U1457	C	23	R	3	W	139	54	56	398.7	1.3952	0.1319	10.5759	10.6029	-19.269	34.875	39.4815	25.6435
85	U1457	C	23	R	5	W	128	72	74	401.77	0.2891	0.0421	6.8613	12.9411	-21.953	37.1667	16.6574	46.1759
86	U1457	C	24	R	1	W	138	64	66	405.64	0.7296	0.0883	8.2635	7.253	-19.927	37.1667	34.1574	28.6759
87	U1457	C	24	R	3	W	116	88	90	408.66	1.1774	0.1088	10.8173	28.7347	-19.895	37.1667	34.1574	28.6759
88	U1457	C	24	R	5	W	145	110	112	411.5	0.8685	0.0894	9.7136	11.9579	-18.925	36.5417	40.8241	22.6343
89	U1457	C	25	R	1	W	142	74	76	415.44	0.9728	0.0965	10.0812	14.9352	-19.16	34.3333	38.4074	27.2593
90	U1457	C	25	R	3	W	150	80	82	418.42	1.3213	0.1195	11.0536	8.3213	-19.131	35.5833	39.6574	24.7593
91	U1457	C	25	R	5	W	131	68	70	421.31	0.4285	0.0535	8.0113	13.0395	-21.274	36.2917	23.0741	40.6343
92	U1457	C	26	R	1	W	150	104	106	425.44	0.5198	0.0534	9.728	12.9486	-22.374	43.2917	15.4907	41.2176
93	U1457	C	27	R	1	W	102	54	56	434.64	0.4426	0.0424	10.4427	12.6003	-21.053	34.5417	24.2407	41.2176
94	U1457	C	29	R	1	W	131	94	96	436.44	0.3054	0.0306	9.9653	11.0121	-21.774	35.4167	17.9167	46.6667
95	U1457	C	30	R	1	W	87	41	43	463.61	0.2888	0.0247	11.6945	9.8088	-21.831	35.4167	17.9167	46.6667
96	U1457	C	31	R	1	W	150	92	94	473.82	0.2714	0.0305	8.8984	10.7329	-22.204	39.1667	15.3241	45.5093
97	U1457	C	32	R	1	W	71	48	49	483.08	0.5042	0.0624	8.0776	18.9026	-20.513	35.0833	29.25	35.6667
98	U1457	C	33	R	1	W	150	54	55	492.84	0.4304	0.0516	8.3363	13.0311	-21.01	33.9167	24.6574	41.4259
99	U1457	C	33	R	3	W	81	58	59	495.88	0.775	0.0695	11.1468	18.2393	-19.141	35.1667	38.4074	26.4259
100	U1457	C	34	R	1	W	150	80	81	502.8	0.314	0.0328	9.5768	14.7877	-20.566	35.5	29.0648	35.4352
101	U1457	C	34	R	3	W	150	92	93	505.92	1.0628	0.1061	10.0129	5.204	-18.5	35.5417	42.6944	21.7639
102	U1457	C	35	R	1	W	150	42	43	512.12	1.2157	0.1144	10.6265	10.0629	-18.898	36.125	41.1481	22.7269
103	U1457	C	35	R	3	W	150	58	59	515.28	0.6124	0.0685	8.9451	21.8916	-20.015	35.5	34.0648	30.4352
104	U1457	C	35	R	5	W	150	88	89	518.58	0.6544	0.073	8.9628	9.393	-18.943	36.125	41.9815	21.8935
105	U1457	C	36	R	1	W	150	104	105	522.44	0.3716	0.0555	6.6904	10.4454	-21.434	34.625	21.4537	43.9213
106	U1457	C	37	R	1	W	150	34	35	531.44	0.4598	0.0516	8.917	11.9045	-21.226	35.4583	23.8611	40.6806
107	U1457	C	37	R	3	W	69	46	47	534.07	0.196	0.0323	6.0744	12.8053	-22.089	38.2917	16	45.7083
108	U1457	C	38	R	1	W	150	42	43	541.22	0.4157	0.0568	7.313	13.2495	-20.805	37.4583	27.6667	34.875
109	U1457	C	38	R	3	W	71	54	55	544.34	0.3647	0.0484	7.5283	13.7811	-21.563	36.375	20.2407	43.3843
110	U1457	C	39	R	1	W	150	84	85	551.34	0.4706	0.0569	8.2762	11.6445	-21.257	36.375	23.1574	40.4676
111	U1457	C	39	R	3	W	129	84	85	554.34	0.3909	0.0502	7.7931	14.2144	-21.099	34.625	24.3241	41.0509
112	U1457	C	40	R	1	W	131	92	93	561.12	0.3967	0.0536	7.3945	14.3678	-20.838	37.2083	28.25	34.5417
113	U1457	C	40	R	3	W	86	74	75	563.45	0.4513	0.0522	8.6446	15.9619	-20.712	36.3333	28.7407	34.9259
114	U1457	C	41	R	1	W	140	76	77	570.66	0.3602	0.045	8.0064	13.4786	-21.332	36.375	23.1574	40.4676
115	U1457	C	41	R	3	W	77	64	65	572.96	0.5076	0.0513	9.8912	13.7944	-20.276	35.5	31.5648	32.9352
116	U1457	C	42	R	1	W	142	126	128	580.86	0.2591	0.0267	9.6942	13.0803	-22.087	38.2917	16	45.7083
117	U1457	C	43	R	1	W	141	44	45	589.74	0.3166	0.0414	7.6414	13.107	-21.239	35.4583	23.9074	40.6343
118	U1457	C	43	R	3	W	70	61	63	592.32	0.4262	0.0563	7.5757	12.8712	-20.999	33.7083	25.0741	41.2176
119	U1457	C	44	R	1	W	122	52	53	599.52	0.4026	0.0518	7.7685	13.7544	-20.585	35.2917	29.4815	35.2269
120	U1457	C	44	R	3	W	143	58	59	602.3	0.3629	0.0465	7.8113	13.2328	-21.167	35.4583	23.9074	40.6343
121	U1457	C	44	R	5	W	108	80	81	605.37	0.9919	0.1058	9.3779	11.9704	-19.866	36.9583	35.4074	27.6343
122	U1457	C	45	R	1	W	141	42	43	609.12	0.4521	0.0586	7.7201	16.0802	-21.069	34.5833	24.4907	40.9259
123	U1457	C	45	R	3	W	150	86	87	612.47	0.9733	0.0964	10.0995	24.329	-19.549	36.0833	37.75	26.1667
124	U1457	C	45	R	5	W	85	48	49	614.88	0.9297	0.0877	10.5965	19.4251	-19.462	36.0833	37.75	26.1667
125	U1457	C	46	R	1	W	139	18	20	618.58	0.4212	0.0554	7.607	17.8051	-20.217	34.5833	32.4074	33.0093
126	U1457	C	46	R	3	W	150	60	61	621.89	0.831	0.0784	10.6051	27.918	-20.238	34.5833	32.4074	33.0093
127	U1457	C	46	R	5	W	84	64	65	624.33	1.0481	0.0921	11.3826	32.2004	-19.628	34.5833	37.4074	28.0093
128	U1457	C	47	R	1	W	150	91	93	629.01	0.8508	0.0724	11.7565	34.5261	-19.846	35.9583	36.4444	27.5972
129	U1457	C	47	R	3	W	150	110	111	632.2	0.5753	0.062	9.2779	6.8139	-17.933	35.4583	47.6574	16.8843
130	U1457	C	47	R	6	W	150	48	49	636.08	0.2671	0.0444	6.0183	17.3968	-20.985	33.7083	25.0741	41.2176
131	U1457	C	48	R	1	W	99	45	47	638.25	0.5933	0.0763	7.773	16.1852	-20.634	35.2917	29.4815	35.2269
132	U1457	C	49	R	1	W	150	52	54	648.02	0.2336	0.0586	3.9854	14.0819	-23.202	55.8333	18.1481	26.0185
133	U1457	C	49	R	3	W	150	60	61	651.1	0.3095	0.0411	7.5271	14.3428	-23.651	63.4583	18.5278	18.0139
134	U1457	C	49	R	5	W	111	78	79	654.28	0.5901	0.0359	16.4279	16.6302	-24.195	68.4167	18.1852	13.3981
135	U1457	C	50	R	1	W	145	42	43	657.62	0.2447	0.0456	5.3689	13.9478	-22.466	46.8333	16.3241	36.8426
136	U1457	C	50	R	3	W	150	70	71	660.86	0.5309	0.0772	6.8771	8.2755	-20.781	37.6667	27.9907	34.3426
137	U1457	C	50	R	5	W	120	86	87	664.04	0.1738	0.0457	3.8032	5.104	-23.086	56.0833	18.0741	25.8426
138	U1457	C	51	R	1	W	150	48	49	667.38	0.2596	0.0628	4.1338	13.5386	-21.581	36.375	20.2407	43.3843
139	U1457	C	51	R	3	W	150	50	51	670.4	0.3632	0.0634	5.7265	15.4919	-21.197	35.4583	23.9074	40.6343
140	U1457	C	51	R	5	W	59	44	45	673.32	0.2586	0.0565	4.5756	14.7127	-23.383	56.7083	18.0741	25.2176
141	U1457	C	52	R	1	W	141	80	81	677.4	0.3261	0.0502	6.4983	15.9744	-24.011	64.2083	18.0741	17.7176
142	U1457	C	53	R	1	W	140	50	51	686.8	0.3382	0.0498	6.7974	17.256	-24.315	67.5833	18.3241	14.0926
143	U1457	C	53	R	3	W	136	72	73	689.88	0.3278	0.0497	6.5936	14.3436	-23.83	63.7083	18.7778	17.5139
144	U1457	C	54	R	1	W	104	78	79	696.78	0.3166	0.0439	7.2106	15.3719	-23.974	64.7083	18.1111	17.1806
145	U1457	C	55	R	1	W	124	94	95	706.64	0.3363	0.0417	8.0595	22.3574	-23.706	61.625	18.4537	19.9213
146	U1457	C	56	R	1	W	120	62	63	716.02	0.3094	0.0538	5.7498	14.6986	-24.04	64.625	18.1204	17.2546
147	U1457	C	57	R	1	W	150	38	39	725.48	0.3544	0.0521	6.804	14.1128	-23.884	64.125	18.4537	17.4213
148	U1457	C	57	R	3	W	55	42	43	728.02	0.4397	0.0557	7.8872	14.4986	-24.138	66.4167	18.4537	15.1296
149	U1457	C	58	R	1	W	119	44	45	735.24	0.2911	0.0395	7.3692	13.3328	-23.887	64.125	18.4537	17.4213
150	U1457	C	58	R	3	W	106	60	61	737.98	0.3259	0.0537	6.0653	14.2753	-23.569	61	18.7778	20.2222
151	U1457	C	59	R	1	W	141	42	44	744.92	0.3584	0.0729	4.9187	13.8169	-24.525	68.875	18.5278	12.5972
152	U1457	C	60	R	1	W	150	32	33	754.52	0.3386	0.0557	6.0785	15.9335	-24.296	67	18.5278	14.4722
153	U1457	C	60	R	3	W	120	40	41	757.6	0.2808	0.0324	8.6724	14.4128	-24.703	69.9167	18.5278	11.5556
154	U1457	C	61	R	1	W	147	44	45	764.34	0.3469	0.0478	7.2563	16.341	-24.962	71.4167	18.3611	10.2222
155	U1457	C	61	R	3	W	66	52	53	766.74	0.375	0.0621	6.0339	14.4228	-25.063	72.4167	18.5278	9.0556
156	U1457	C	62	R	1	W	109	50	52	774.1	0.3221	0.0601	5.3631	14.1228	-25	71.4167	18.3611	10.2222
157	U1457	C	63	R	1	W	140	28	29	783.58	0.3424	0.0638	5.3705	13.3228	-24.978	71.4167	18.3611	10.2222
158	U1457	C	63	R	3	W	95	38	39	786.11	0.3344	0.0501	6.6758	15.4435	-24.416	68.125	18.2407	13.6343
159	U1457	C	64	R	1	W	150	71	73	793.71	0.3646	0.0658	5.5437	13.7919	-22.878	52.7083	17.4074	29.8843
160	U1457	C	64	R	3	W	97	80	81	796.3	0.3187	0.0611	5.2203	15.2319	-24.581	65.4583	17.5648	16.9769
161	U1457	C	65	R	1	W	142	30	31	803	0.1472	0.0355	4.1508	15.1761	-24.8	66.9167	17.5648	15.5185
162	U1457	C	65	R	3	W	126	54	55	806.12	0.1065	0.0501	2.1249	15.756	-24.021	65.7083	17.0741	17.2176
163	U1457	C	65	R	5	W	108	64	66	808.85	0.0742	0.0496	1.4975	16.1535	-24.503	70.9583	17.3241	11.7176
164	U1457	C	66	R	1	W	121	48	49	812.88	0.1769	0.0536	3.2998	15.3269	-24.767	73.5	17.4815	9.0185
165	U1457	C	66	R	3	W	85	60	61	815.57	0.1515	0.057	2.6568	13.6728	-24.242	68	17.0741	14.9259
166	U1457	C	68	R	1	W	150	60	61	832.4	0.0378	0.0635	0.5961	3.539	-22.358	43.3333	15.7407	40.9259
167	U1457	C	68	R	4	W	137	42	43	835.76	0.2146	0.0611	3.5126	1.8566	-22.151	39.1667	15.3241	45.5093
168	U1457	C	68	R	6	W	101	52	53	838.42	0.2012	0.0596	3.3734	1.3316	-23.046	53.3333	15.3241	31.3426
169	U1457	C	69	R	1	W	132	46	47	841.96	0.245	0.0638	3.8415	2.5632	-22.505	47.0417	15.9074	37.0509
170	U1457	C	69	R	4	W	112	34	35	845.83	0.1296	0.0689	1.8809	4.7473	-21.807	35.4167	17.9167	46.6667
171	U1457	C	69	R	7	W	127	48	49	849.74	0.0936	0.0729	1.2851	1.4899	-22.019	37.1667	16.6574	46.1759
172	U1457	C	70	R	1	W	150	52	53	851.72	0.2023	0.0776	2.6067	2.3007	-21.182	35.3333	23.9907	40.6759
173	U1457	C	70	R	3	W	149	68	69	854.88	0.2197	0.065	3.3782	1.1795	-22.376	43.2083	15.8241	40.9676
174	U1457	C	70	R	5	W	147	80	81	858.01	0.2075	0.0756	2.7467	1.5949	-22.402	43.2083	15.8241	40.9676
175	U1457	C	71	R	1	W	150	40	41	861.3	0.1497	0.0716	2.09	3.0632	-22.308	42.3333	16.4074	41.2593
176	U1457	C	71	R	3	W	150	54	55	864.44	0.1979	0.0617	3.207	12.407	-22.448	43.2083	15.8241	40.9676
177	U1457	C	71	R	5	W	150	62	63	867.52	0.0928	0.0682	1.3594	2.8949	-22.719	50.375	16.3704	33.2546
178	U1457	C	72	R	1	W	150	42	43	871.02	0.2804	0.0793	3.5348	9.9296	-21.978	37.1667	16.6574	46.1759
179	U1457	C	72	R	3	W	150	68	69	874.28	0.2048	0.0819	2.4997	3.1282	-22.217	39.1667	15.3241	45.5093
180	U1457	C	72	R	5	W	150	80	81	877.4	0.2828	0.0818	3.4573	4.9765	-21.706	37.4167	19.4074	43.1759
181	U1457	C	73	R	1	W	150	38	39	880.68	0.3018	0.0799	3.7783	5.1906	-22.049	37.2917	16.5278	46.1806
182	U1457	C	73	R	3	W	150	50	51	883.8	0.1991	0.0772	2.5795	1.4224	-22.22	39.1667	15.3241	45.5093
183	U1457	C	73	R	5	W	150	44	45	886.76	0.4445	0.0911	4.8799	4.6615	-21.334	36.5417	22.9074	40.5509
184	U1457	C	74	R	1	W	150	32	33	890.32	0.4707	0.0931	5.0564	9.7004	-21.569	36.375	20.1944	43.4306
185	U1457	C	74	R	3	W	150	40	41	893.4	0.2477	0.0845	2.9311	1.5933	-21.852	33.5	16	50.5
186	U1457	C	74	R	5	W	150	48	49	896.48	0.493	0.0932	5.2908	10.3421	-21.36	34.4167	21.5	44.0833
187	U1457	C	75	R	1	W	152	40	41	900.1	0.2555	0.0773	3.3065	6.3072	-22.031	37.0833	16.5741	46.3426
188	U1457	C	75	R	3	W	150	48	49	903.2	0.2275	0.0643	3.5402	1.6816	-22.975	52.625	15.6111	31.7639
189	U1457	C	75	R	5	W	111	44	45	906.16	0.2309	0.068	3.3944	1.1225	-23.806	65.0417	16.3148	18.6435
190	U1457	C	76	R	1	W	139	28	29	909.68	0.5402	0.0948	5.6994	4.9006	-21.248	35.25	23.9074	40.8426
191	U1457	C	76	R	3	W	130	40	41	912.53	0.391	0.0848	4.612	5.3131	-21.081	34.375	24.4907	41.1343
192	U1457	C	76	R	5	W	134	38	39	915.01	0.3629	0.0744	4.8801	7.4455	-22.106	38.2917	16	45.7083
193	U1457	C	76	R	7	W	116	42	43	917.85	0.2008	0.0789	2.545	4.2815	-21.82	35.4167	17.9167	46.6667
194	U1457	C	77	R	1	W	108	48	49	919.58	0.2588	0.0751	3.4447	8.7463	-22.39	43.2917	15.5833	41.125
195	U1457	C	77	R	4	W	150	50	51	923.68	0.2292	0.0762	3.0084	5.9323	-22.067	38.2917	16	45.7083
196	U1457	C	77	R	6	W	150	72	73	926.9	0.2665	0.0775	3.4398	4.779	-22.766	52.5417	16.5	30.9583
197	U1457	C	78	R	1	W	123	40	41	929.2	0.3448	0.0848	4.0638	3.4665	-22.243	39.1667	15.3241	45.5093
198	U1457	C	78	R	3	W	148	40	41	931.95	0.4136	0.0875	4.7249	3.8507	-22.006	37.2917	16.5278	46.1806
199	U1457	C	78	R	5	W	145	46	47	934.69	0.4675	0.0802	5.8258	12.0612	-22.155	39.1667	15.3241	45.5093
200	U1457	C	79	R	1	W	145	42	43	938.92	0.4697	0.0899	5.2263	5.0148	-21.816	35.4167	17.9167	46.6667
201	U1457	C	79	R	3	W	150	50	51	941.95	0.3996	0.081	4.9311	5.6081	-21.526	35.375	20.9537	43.6713
202	U1457	C	79	R	5	W	150	64	65	945.09	0.3813	0.0825	4.6209	8.668	-21.885	33.5	16	50.5
203	U1457	C	80	R	1	W	150	48	49	948.68	0.5843	0.0979	5.968	4.8265	-21.18	35.25	23.9074	40.8426
204	U1457	C	80	R	3	W	150	60	61	951.8	0.2112	0.0729	2.8982	2.7807	-23.018	52.2083	17.2778	30.5139
205	U1457	C	80	R	5	W	150	88	89	955.08	0.4319	0.0864	4.997	5.004	-21.719	37	19.8241	43.1759
206	U1457	C	81	R	1	W	150	46	47	958.36	0.3244	0.0724	4.4793	7.8155	-22.013	37.0833	16.5741	46.3426
207	U1457	C	81	R	3	W	150	52	53	961.42	0.3597	0.0735	4.8918	7.7355	-22.066	38.2917	16	45.7083
208	U1457	C	81	R	5	W	150	74	75	964.64	0.1867	0.0758	2.4631	0.9511	-22.608	49.2917	16.4907	34.2176
209	U1457	C	82	R	1	W	150	64	65	968.24	0.3357	0.0818	4.1047	3.8565	-21.761	35.4167	17.9167	46.6667
210	U1457	C	82	R	3	W	150	56	57	971.16	0.3071	0.0793	3.8747	3.894	-21.983	37.1667	16.6574	46.1759
211	U1457	C	82	R	5	W	94	70	71	973.81	0.4711	0.0914	5.1527	8.2988	-21.476	35.375	20.9537	43.6713
212	U1457	C	83	R	1	W	149	42	43	977.72	0.3247	0.0846	3.8362	4.0982	-21.814	35.4167	17.9167	46.6667
213	U1457	C	83	R	3	W	150	54	55	980.83	0.578	0.1007	5.7424	7.7047	-21.137	34.5417	24.3333	41.125
214	U1457	C	83	R	5	W	150	70	71	983.99	0.6419	0.1059	6.0624	3.9673	-20.961	33.6667	24.9167	41.4167
215	U1457	C	84	R	1	W	150	48	49	987.48	0.2465	0.0728	3.3847	5.5248	-22.038	37.1667	16.6574	46.1759
216	U1457	C	84	R	3	W	150	70	71	990.7	0.3229	0.0868	3.7221	3.1132	-21.979	37.1667	16.6574	46.1759
217	U1457	C	84	R	5	W	150	104	105	994.04	0.5546	0.088	6.2997	1.2145	-21.734	37.1667	19.5741	43.2593
218	U1457	C	85	R	1	W	146	22	23	996.92	0.2174	0.047	4.6236	5.7206	-23.792	61.4583	17.7315	20.8102
219	U1457	C	85	R	3	W	68	31	33	999.59	0.1665	0.0455	3.6563	6.9972	-24.156	64.625	17.1019	18.2731
220	U1457	C	86	R	1	W	150	4	5	1006.14	0.1626	0.0498	3.268	5.1665	-24.101
221	U1457	C	88	R	1	W	145	39	41	1016.49	0.1836	0.0050418	36.4156	75.1453	-23.996
222	U1457	C	88	R	3	W	150	41	43	1019.43	0.222	0.0055675	39.8743	78.8402	-24.128
223	U1457	C	88	R	5	W	146	63	65	1022.63	0.1894	ND	–	80.5409	-24.806
224	U1457	C	89	R	1	W	132	32	33	1025.72	0.1611	ND	–	77.5944	-25.096
225	U1457	C	89	R	2	W	147	60	61	1027.32	0.329	ND	–	27.5172	-24.993
226	U1457	C	89	R	4	W	136	40	41	1029.89	0.2016	ND	–	61.4809	-25.612
227	U1457	C	90	R	2	W	149	96	97	1036.7	0.6282	ND	–	95.707	-26.9212
228	U1457	C	92	R	1	W	145	94	95	1053.64	0.221	ND	–	96.567	-25.7155
229	U1457	C	93	R	1	W	150	66	67	1062.86	0.0872	0.01	8.7303	1.4441	-25.308
230	U1457	C	93	R	3	W	114	80	81	1065.95	0.5205	0.0301	17.2754	9.058	-26.38
231	U1457	C	94	R	1	W	130	78	79	1072.28	0.6348	0.028	22.6362	16.2244	-26.085
232	U1457	C	95	R	1	W	131	48	49	1081.28	0.6499	0.0358	18.1401	2.0033	-26.068
233	U1457	C	95	R	3	W	116	50	51	1084.09	0.2397	0.0137	17.5382	1.6416	-26.643
234	U1457	C	96	R	1	W	142	30	31	1090.4	0.0892	0.0059351	15.029	0.6555	-26.451
235	U1457	C	96	R	2	W	81	68	69	1092.2	0.3889	0.0412	9.4447	0.4741	-25.843
